# Supplementary material for: Highly sensitive detection of circulating tumour cells based on an ASV/CV dual-signal electrochemical strategy
Source: Royal Society of Chemistry journal article supplement (doi:10.1039/d3ra04856j), 2023-01-01
Supplement: d3ra04856j1.pdf [file d3ra04856j1.pdf]

## Supplementary information

Highly sensitive detection of circulating tumor cells based on ASV/CV  
dual-signal electrochemical strategy

Gang Wang, ‡ Dan Han, ‡ Qingyu Zhang\*

Department of Gastroenterology, Tianjin Medical University General Hospital

**\*Corresponding author.**

Qingyu Zhang

**Email address:** [zhangqy@tmu.edu.cn](mailto:zhangqy@tmu.edu.cn)

‡ These authors contributed equally.

**Address:** Department of Gastroenterology, Tianjin Medical University General Hospital, Anshan Road 154, Heping District, Tianjin, 300052, China.

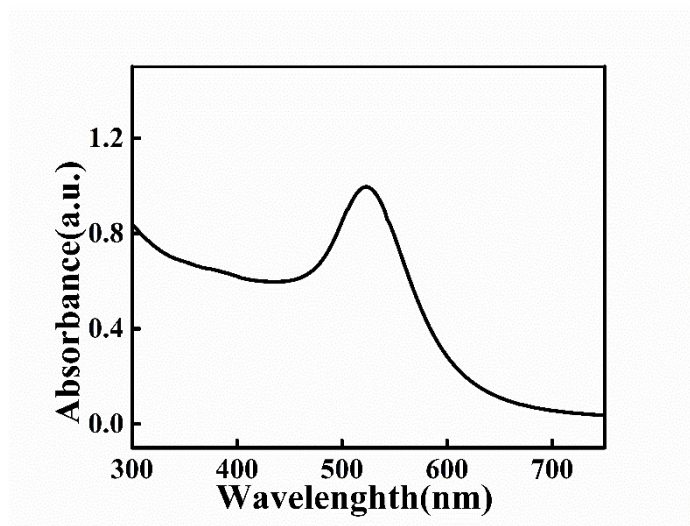

Fig S1 The UV-vis absorption of Au NPs

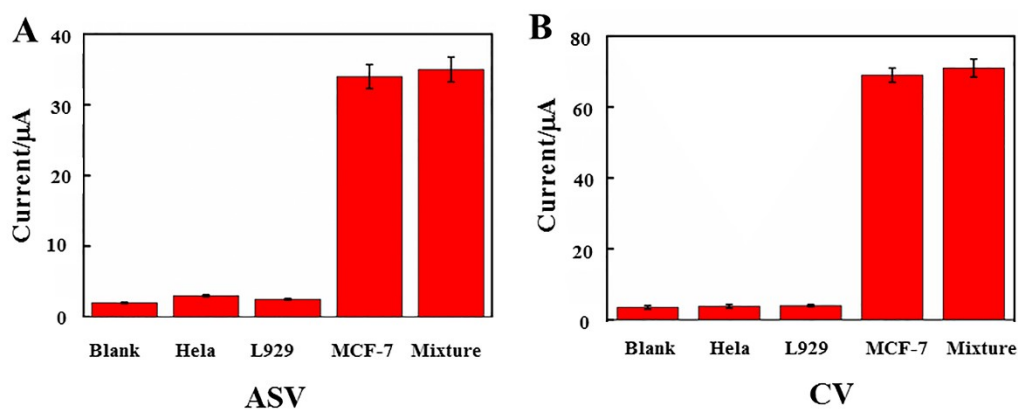

Fig S2 The effect for detection of different cells (HeLa, L929, MCF-7 and mixture) in (A)ASV and (B)CV

Table S1 The reproducibility of this dual-signal electrochemical biosensor (n=5; CTCs concentration,  $10^3$  cells  $\text{mL}^{-1}$ )

|                       | No. 1 | No. 2 | No. 3 | No. 4 | No. 5 | RSD (%) |
|-----------------------|-------|-------|-------|-------|-------|---------|
| ASV ( $\mu\text{A}$ ) | 22.19 | 20.85 | 21.10 | 20.76 | 21.20 | 2.7     |
| CV ( $\mu\text{A}$ )  | 64.77 | 62.85 | 63.76 | 65.02 | 63.84 | 0.84    |

**Table S2 The stability of this dual-signal electrochemical biosensor (CTCs concentration,  $10^3$  cells  $\text{mL}^{-1}$ )**

|                                       | Initial value | Five days |               | Eight days |               | Ten days |               | Twenty days |               |
|---------------------------------------|---------------|-----------|---------------|------------|---------------|----------|---------------|-------------|---------------|
|                                       | $I_0$         | $I_1$     | $I_1/I_0, \%$ | $I_2$      | $I_2/I_0, \%$ | $I_3$    | $I_3/I_0, \%$ | $I_4$       | $I_4/I_0, \%$ |
| <b>ASV (<math>\mu\text{A}</math>)</b> | 22.20         | 21.75     | 98.0          | 21.20      | 95.50         | 20.76    | 93.50         | 19.98       | 90.0          |
| <b>CV (<math>\mu\text{A}</math>)</b>  | 64.80         | 62.53     | 96.5          | 61.75      | 95.30         | 59.75    | 92.20         | 57.64       | 89.0          |
